# Supplementary material for: Proteogenomic analysis reveals non-small cell lung cancer subtypes predicting chromosome instability, and tumor microenvironment
Source: PubMed Central journal article supplement — Nat Commun. 2024 Nov 23;15:10164. doi: 10.1038/s41467-024-54434-4 (PMC11585665; doi:10.1038/s41467-024-54434-4), 2024-11-23
Supplement: 41467_2024_54434_MOESM1_ESM.pdf [file 41467_2024_54434_MOESM1_ESM.pdf]

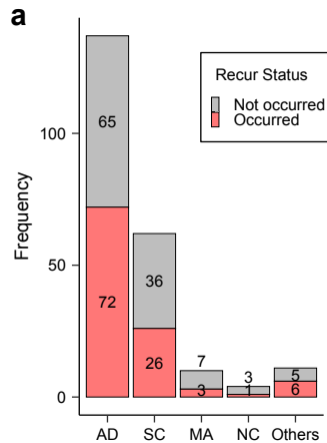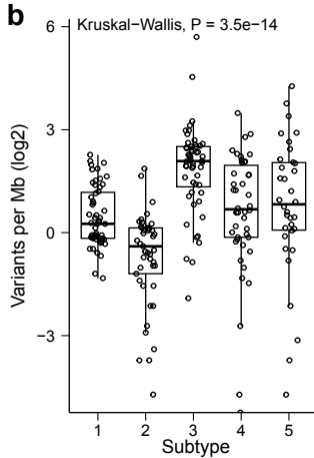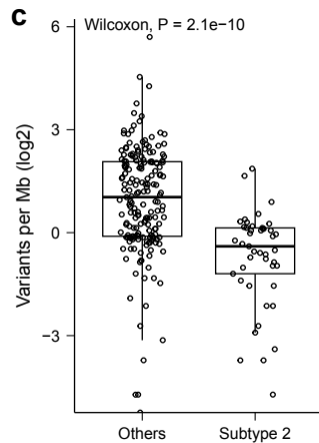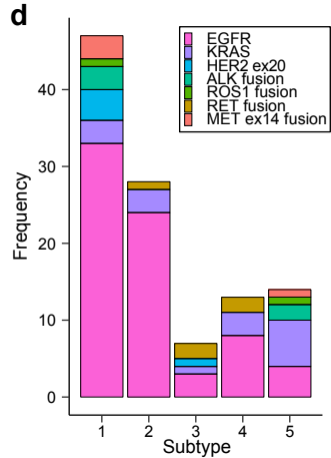

**Supplementary Fig. 1 | Description of 229 Korean patients with NSCLC.**

**a**, Recurrent status according to histology (DX) for the patients with NSCLC (adenocarcinoma, "AD"; squamous cell carcinoma, "SC"; mucinous adenocarcinoma, mixed mucinous and non-mucinous adenocarcinoma, "MA"; large cell neuroendocrine carcinoma, "NC"; adenosquamous carcinoma, combined small cell carcinoma and adenocarcinoma, enteric adenocarcinoma, large cell carcinoma, pleomorphic carcinoma, "Others"). The color of bar represents recurrence status with each patient. **b-c**, Multiple comparison of tumor mutation burden (TMB) status between five subtypes and comparison between Subtype 2 and other subtypes. TMB were calculated by variants per Mb using whole exome sequencing data. The p-value was calculated using the two-sided Kruskal-Wallis test (b) and wilcoxon test (c). For box-plots, middle line, median; box edges, 25<sup>th</sup> and 75<sup>th</sup> percentiles; whiskers, most extreme points that do not exceed  $\pm 1.5 \times \text{IQR}$ . **d**, Mutation frequency according to five subtypes.

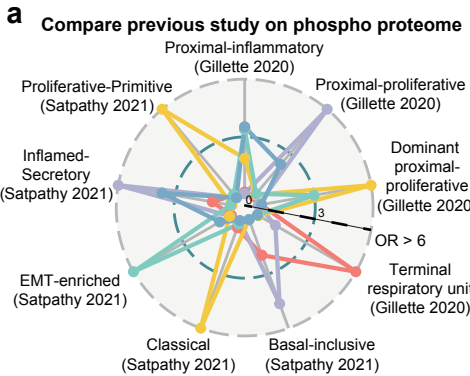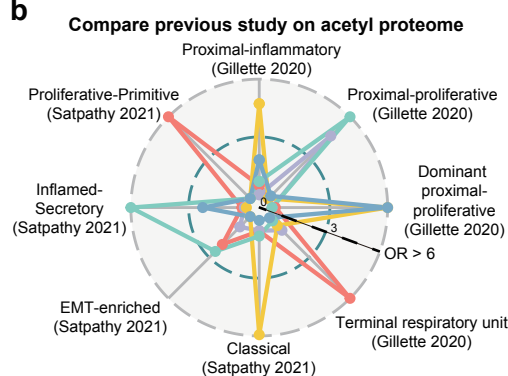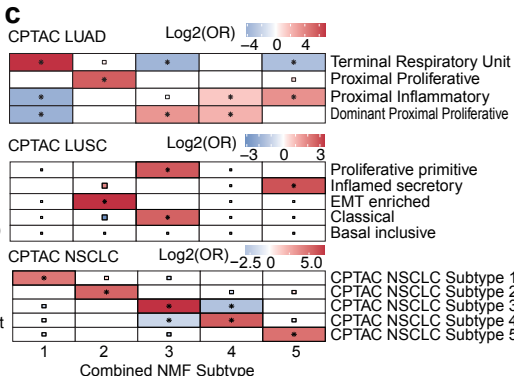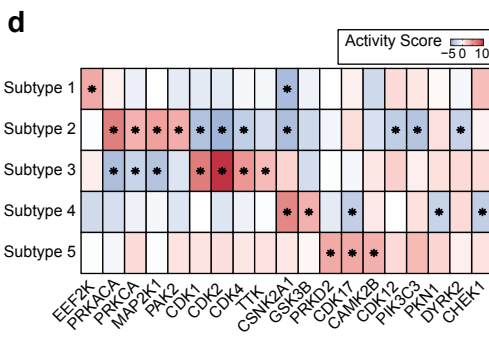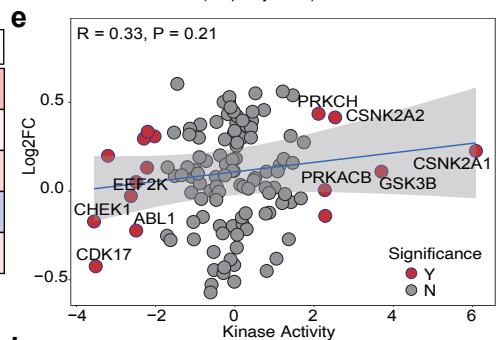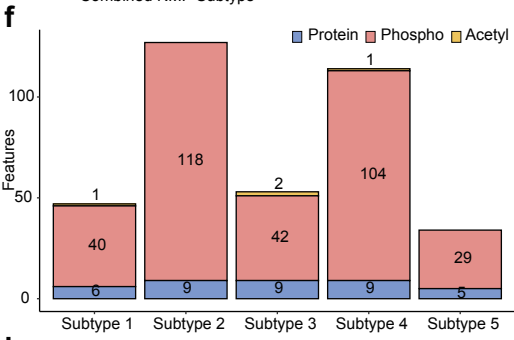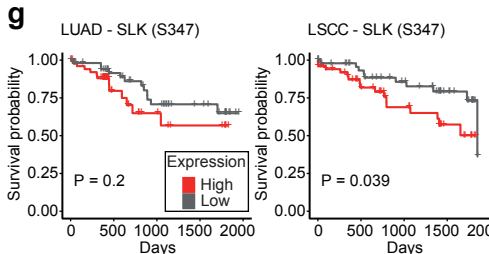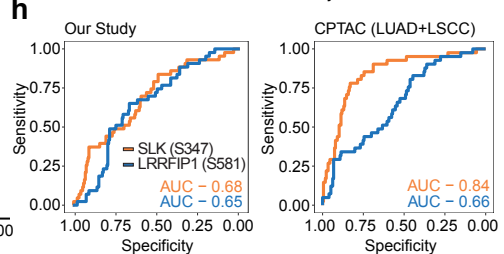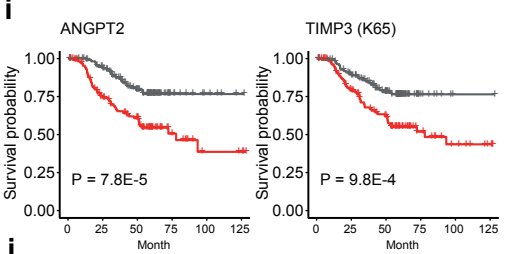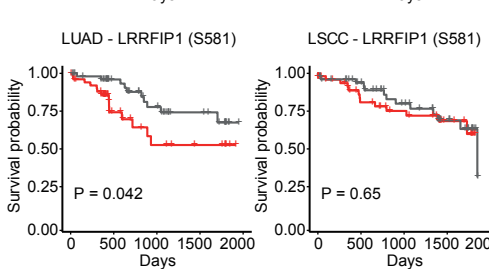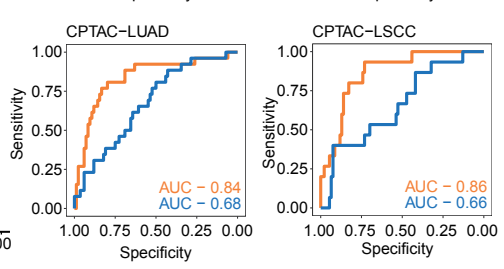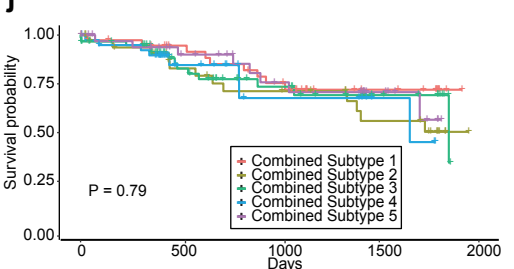

**Supplementary Fig. 2 | Characteristics of subtypes compared with CPTAC cohort and features related with poor prognosis.** **a-b**, Overlap of subtype features between the five NMF subtypes in this study and subtypes identified in previous NSCLC multiomics studies on phospho-, acetyl proteome data. **c**, Heatmap of overlaps related to **Fig. 2b**. A statistical significance calculated using two-sided Fisher's exact test with Benjamini-Hochberg adjustment (a-c). Full rectangle and asterisk indicate significant overlaps (Adjusted  $P \leq 0.05$ ); faint rectangle indicates overlaps that pass only the nominal P value (Fisher's exact test  $P \leq 0.05$ , adjusted  $P > 0.05$ ); and blank indicates overlaps which is not significant (Fisher's exact test  $P > 0.05$ ). **d**, Heatmap of significant kinases on subtypes. The color represents kinase activity derived from phosphoproteome data at each subtype and asterisk were displayed with significant results (\*, adjusted  $P < 0.05$ ). P-value was obtained from multivariate linear model and adjusted p-value was calculated using the Benjamini-Hochberg adjustment. **e**, Correlation of the kinase expression and estimated activity using two-sided Pearson correlation method. The color of points indicates statistical significance **f**, Distribution of unfavorable prognostic factor which overlapped with differentially expressed on subtypes. The color of bar plot represents data type of features. **g**, Survival curves of poor prognosis markers which contains *SLK* (S347) and *LRRFIP1* (S581) on CPTAC LUAD cohort and LSCC cohort. The p-value was calculated with the log-rank test. **h**, ROC curve analysis results for our cohort and the CPTAC cohort using *SLK* (S347) and *LRRFIP1* (S581). The color of lines indicates each features. **i**, Survival curves of features which are up-regulated

on Subtype 4 and related with HIF-1 signaling pathway which contributes poor prognosis on our cohort were represented. The p-value was calculated with the log-rank test. **j**, Survival plot of CPTAC NSCLC cohort between combined subtypes. The color illustrated each combined subtype.

**a**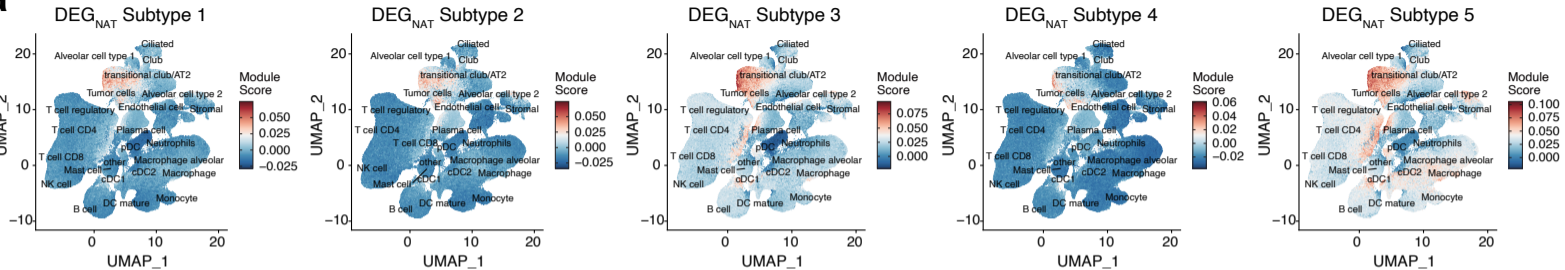**b**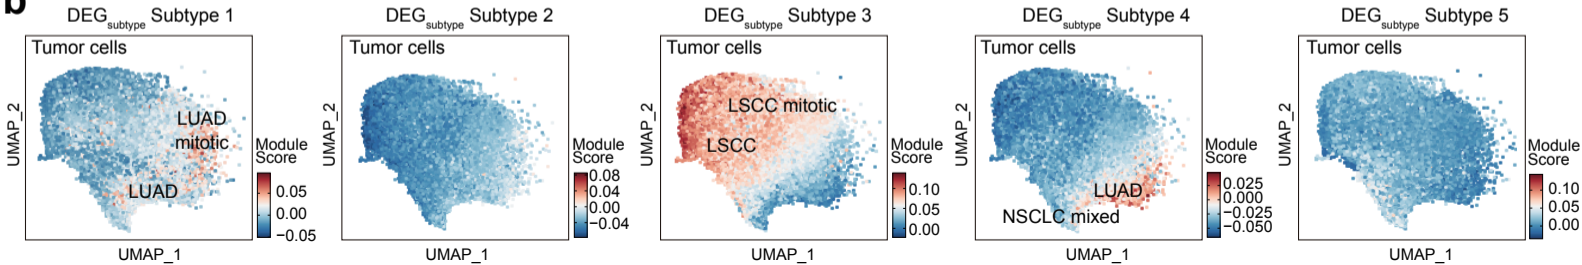

**Supplementary Fig. 3| UMAP of single-cell type specific Subtype 1 to 5** **a**, The results of single-cell type specific Subtype 1 to 5 using each  $DEG_{NAT}$ . Each point color represents the module score of each cell, and the more relevant it is to the cell types, the higher score is represented in red color. **b**, Umap of single-cell type specific tumor cell with  $DEG_{subtype}$ . UMAP information was obtained from the original study<sup>23</sup>.

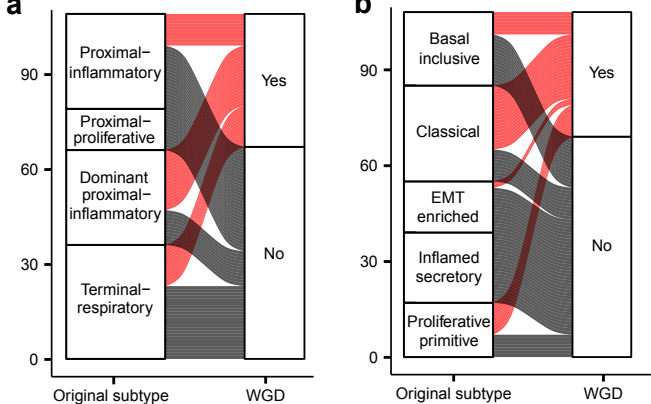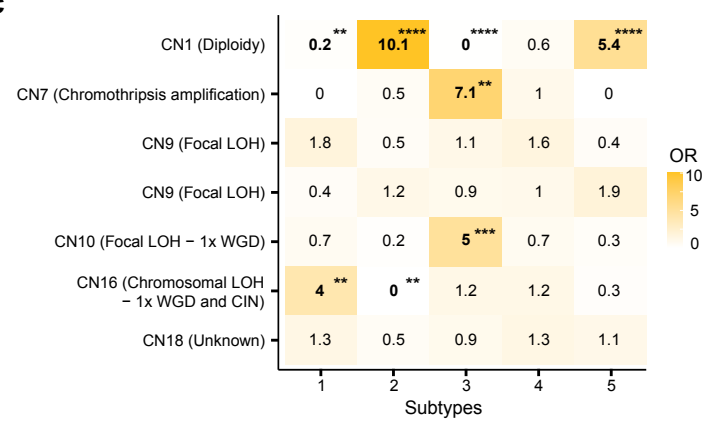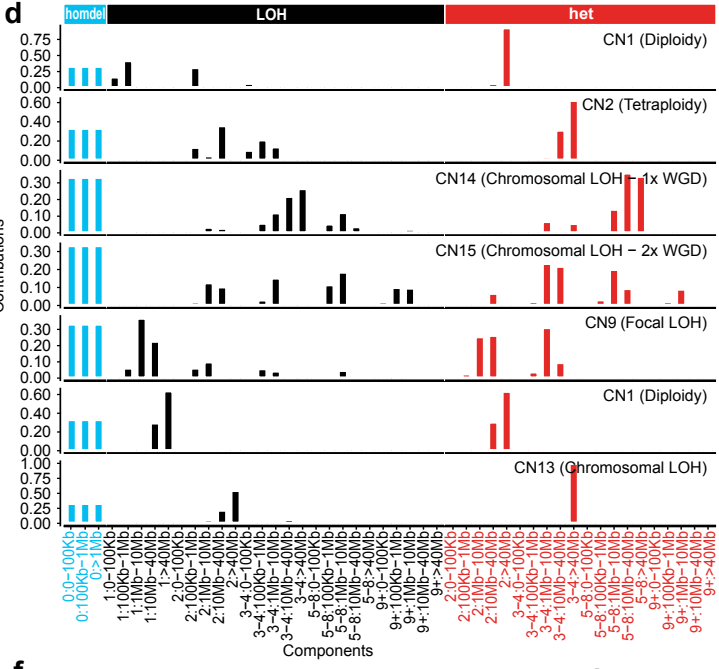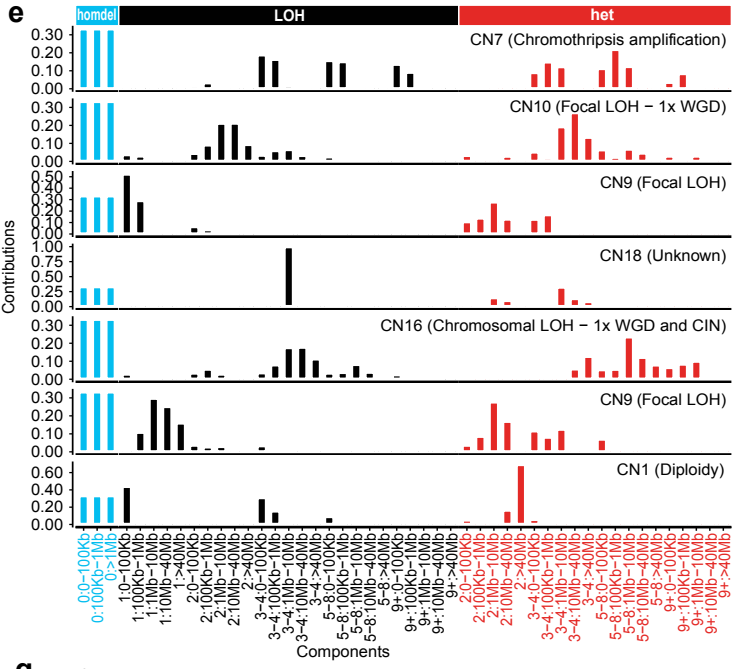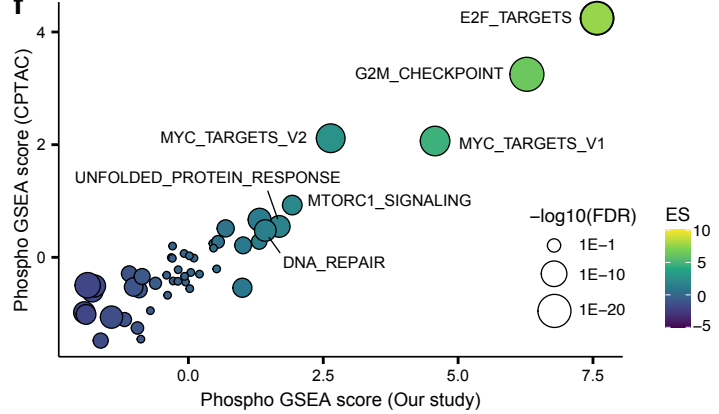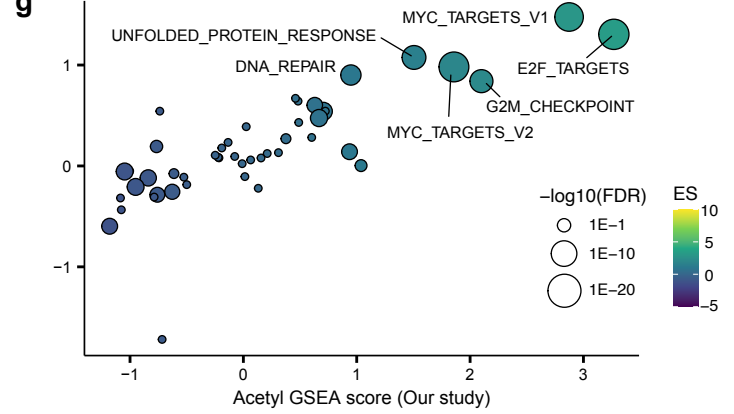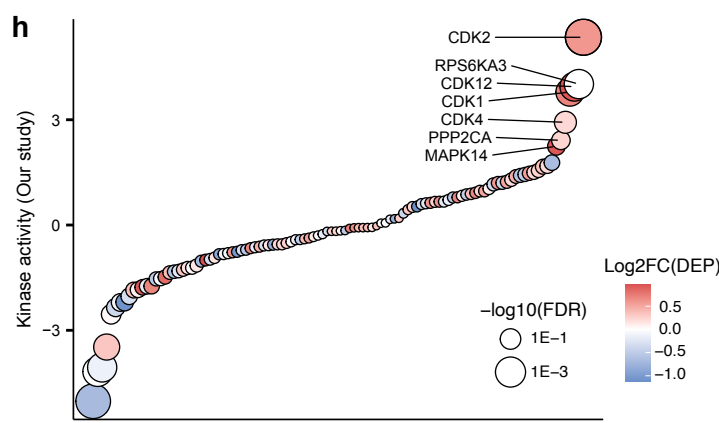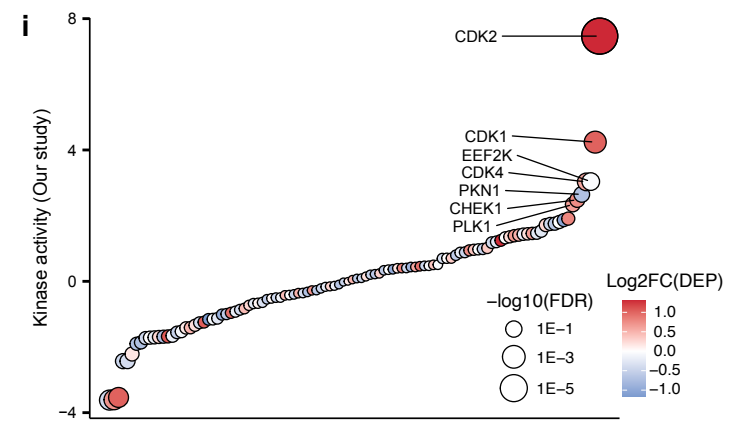



**Supplementary Fig. 4 | Proteogenomic features underlying whole-genome**

**doubling in NSCLC subtypes. a**, Alluvial plot showing WGD-positive samples in

original subtypes from the CPTAC LUAD cohort. **b**, Alluvial plot showing WGD-

positive samples in original subtypes from the CPTAC LSCC cohort. **c**, Overlap of

copy number signatures and the combined NMF subtypes in the CPTAC cohorts.

The colors indicate the odds ratio of two-sided Fisher's exact test. The COSMIC v3

signature and etiology for each signature are indicated on the y-axis. Significance

levels are denoted by the number of asterisks. \*P < 0.05, \*\*P < 0.01, \*\*\*P < 0.001,

\*\*\*\*P < 0.0001. **d**, Mutational profile of CN signature in our cohort. **e**, Mutational

profile of CN signature in CPTAC cohorts. The COSMIC v3 signature and etiology

for each CN signature are written in each signature profile. LOH, loss of

heterozygosity; 1x WGD, once-genome-doubled; 2x WGD, twice-genome-doubled;

CIN, chromosome instability. **f**, Dot plot of phosphoprotein-level gene set

enrichment analysis (GSEA) revealing upregulated pathways in Subtype 3 in both

cohorts. **g**, Dot plot of acetyl protein-level GSEA revealing upregulated pathways

in Subtype 3 in both cohorts. The x- and y-axis are enrichment scores (ES) from

the current study and CPTAC NSCLC data, respectively. Labeled pathways are the

top 6 upregulated pathways in Subtype 3. The Molecular Signatures Database

(MSigDB) hallmark gene set v7.4 was used for GSEA. **h**, Enriched kinases in Subtype

1 LUAD compared to Subtype 2 LUAD in our cohort. The sizes of points indicate -

$\log_{10}(\text{FDR})$  from kinase activity estimation. The colors of points indicate  $\log_2$  fold

changes of protein expression in Subtype 1 LUAD compared to Subtype 2 LUAD in

our cohort. Significantly upregulated kinases were labeled ( $P < 0.05$ ). **I**, Enriched kinases in Subtype 3 LSCC compared to Subtype 4 and 5 LSCC in our cohort. The sizes of points indicate  $-\log_{10}(\text{FDR})$  from kinase activity estimation. The colors of points indicate  $\log_2$  fold changes in protein expression in Subtype 3 LSCC compared to Subtype 4 and 5 LSCC in our cohort. Significantly upregulated kinases were labeled ( $P < 0.05$ ).

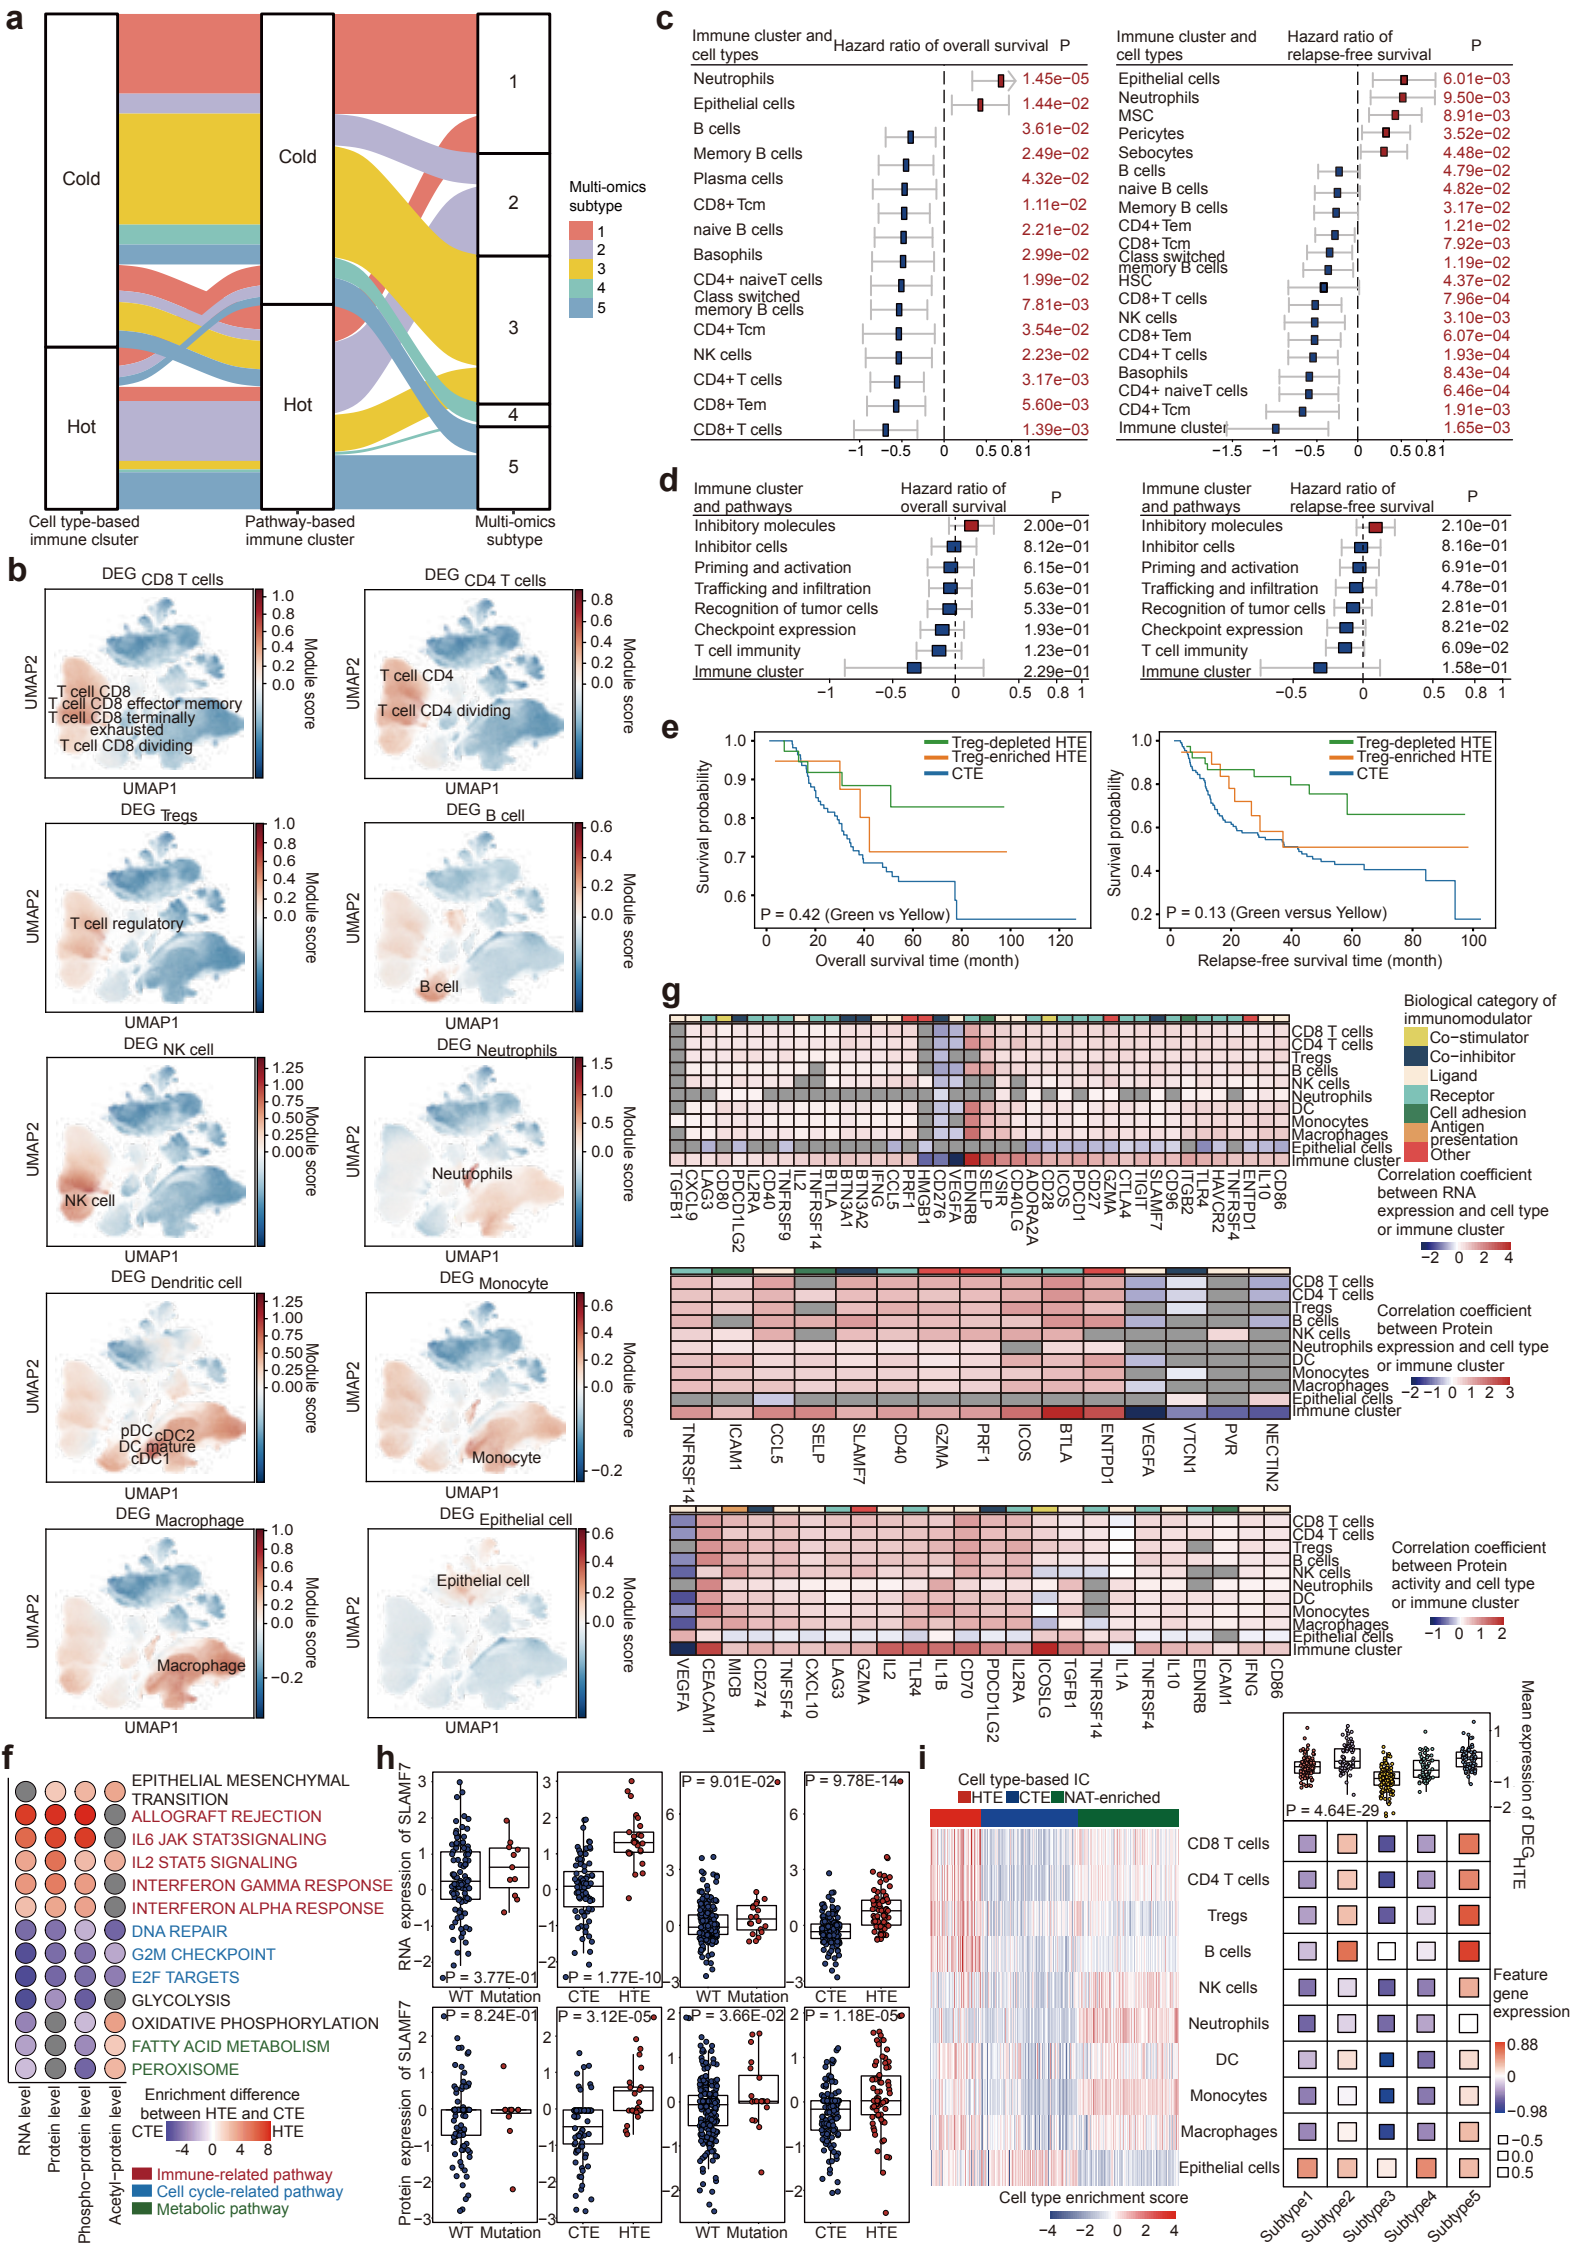

**Supplementary Fig. 5| The characteristics of immune clusters among patients**

**with NSCLC and their correlations with multiomics subtypes.** **a**, Comparison of cell type-based immune cluster, pathway-based immune clusters, and multiomics subtypes. Most of the hot-tumor-enriched (HTE) tumors were included in multiomics subtype 2 and 5. In contrast, a large portion of cold-tumor-enriched (CTE) tumors were matched with multiomics subtype 1, 3, and 4. **b**, The DEG for each cell type was used to generate the UMAP plot of scRNA-seq data. Each point color represents the module score of the cell type-specific DEGs, and the higher score is expressed in red color. The UMAP information was obtained from the multiple NSCLC studies (Salcher et al., 2022). **c-d**, Forest plots showed hazard ratios of OS (left) and RFS (right) across 64 immune and stroma cells in addition to the cell type-based immune cluster (**c**), and 7 immune-related pathways in addition to the pathway-based immune cluster (**d**). Only the results that were statistically significant were described in section (**c**). A lower hazard ratio than zero (blue box) indicates that HTE or a high score of cell type and pathway were associated with longer survival. All hazard ratios (grey lines) are estimated with 95% confidence intervals (CIs). The p-value indicates statistical significance for the survival analysis with log-rank Mantel-Cox test. A red text indicates statistical significance for the survival analysis with log-rank Mantel-Cox test. **e**, Kaplan-Meier curve shows the survival pattern of the 3 groups of patients (n = 174) divided by the status of Tregs, and immune clusters. The p-value was obtained by survival comparison between the two groups of Treg-enriched and Treg-depleted HTE using the log-rank

Mantel-Cox test. **f**, Pathway enrichment analyses were performed between HTE and CTE at transcriptome levels, proteome, phosphoproteome, and acetylproteome using single-sample GSEA and PTM-SEA. The positive and negative t-values of the relevant pathways are colored as red and blue circles. Each analysis result was described as a grey circle when it was not statistically significant ( $P < 0.05$ ). The MSigDB hallmark gene set v7.4 was used for the pathway analysis. **g**, The expression (top and middle) or activity (bottom) of 40 immunomodulators that were known to be cancer cell ligands and immune cell inhibitory receptors<sup>14,121</sup> were tested for correlation with the enrichment score of cell types including the status of immune cluster. Only the immunomodulators having a significant correlation with at least a cell type and with the immune cluster were analyzed for their associations. The clustering was performed column-wise using Euclidean distance measurements. Each correlation was described as a grey color when it was not statistically significant ( $P < 0.05$ ). Correlation coefficients and p-values were obtained from a generalized linear model (GLM). **h**, The left boxplots display the RNA and protein expression of *SLAMF7* according to the *SMARCA4* mutation status (top) and immune cluster (bottom) in two independent multi-omics cohorts derived from the studies of Satpathy et al. ( $n = 202$ ) and Gillette et al. ( $n = 211$ ). The right boxplots depict similar analysis results for the integrative cohort, which includes our cohort in addition to the two independent cohorts. A two-sided t-test was conducted to assess the differences in expression. The box represents the 25th and 75th percentiles, the central mark denotes the median, and the whiskers extend to the

most extreme points within  $\pm 1.5 \times \text{IQR}$ . **i**, (left) Immune subtyping was performed based on the enrichment score of cell types across three multi-omics cohorts including our cohort as described in (h). The consensus clustering was performed in the integrated cohorts. (right) The box and balloon plot show the mean expression of feature genes of HTE and 10 cell types across the integrated multi-omics subtypes. The feature genes were defined as top 300 and 30 genes that were overexpressed in HTE samples and cell-type highly enriched samples, respectively. The center lines, edges, and whiskers of the boxplot indicate the medians, 25th and 75th percentiles, and the most extreme points within  $\pm 1.5 \times \text{IQR}$ , respectively.

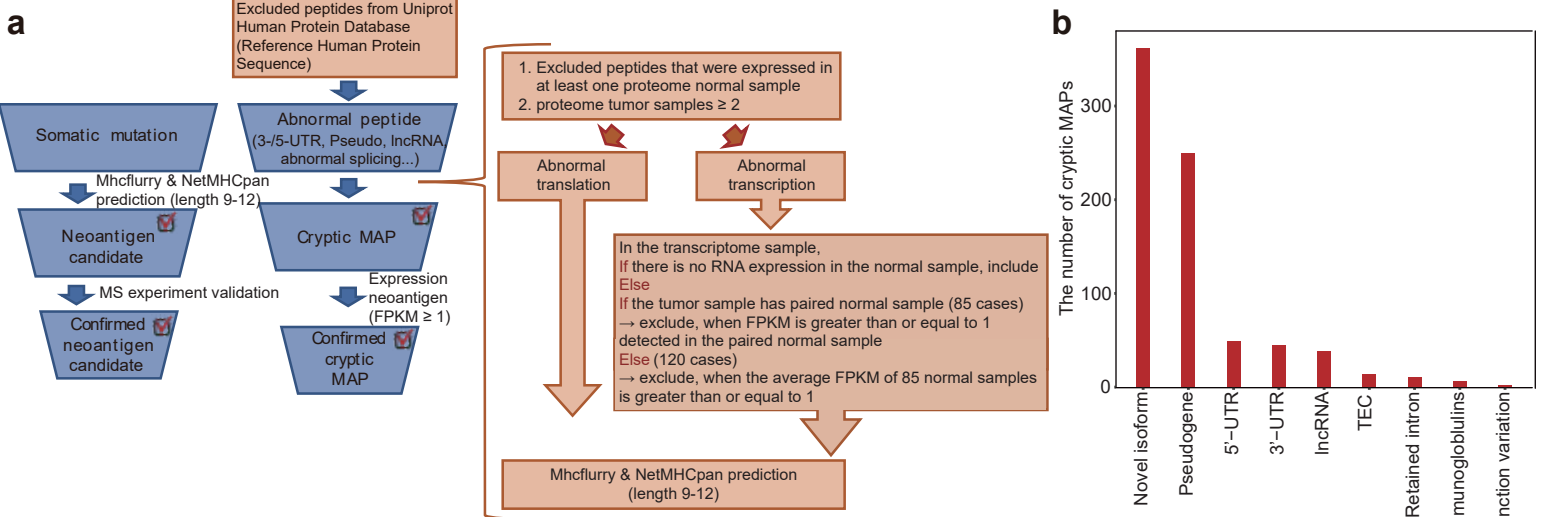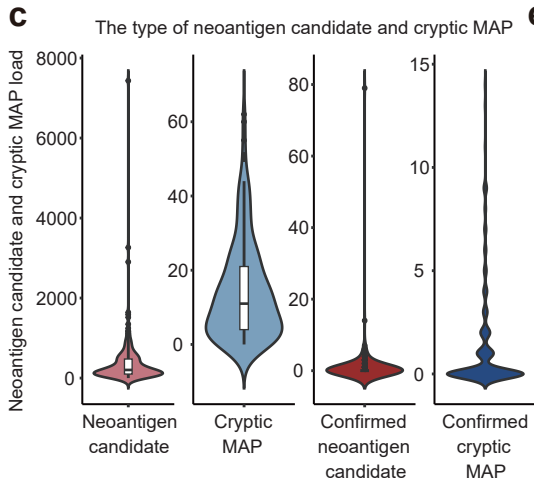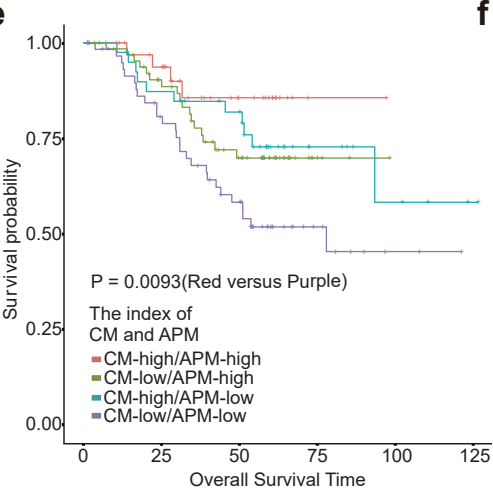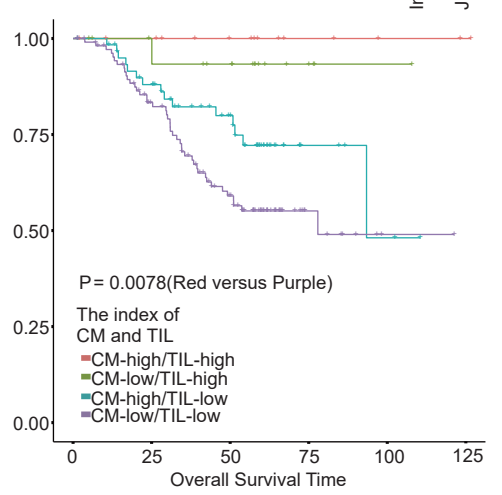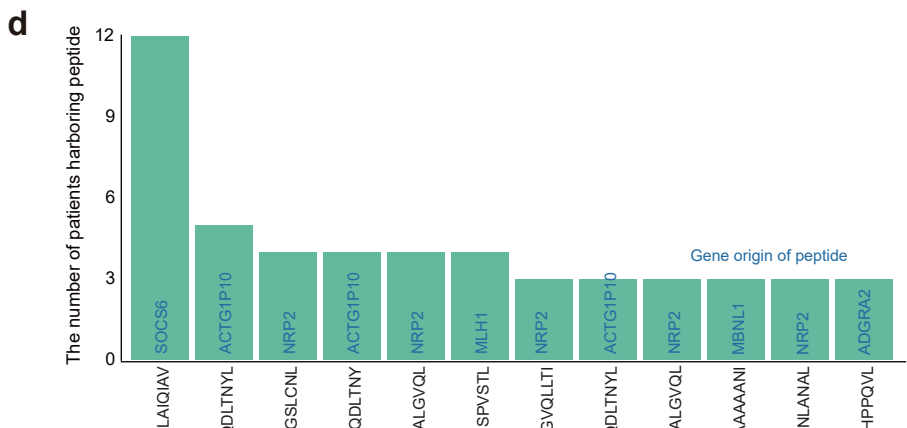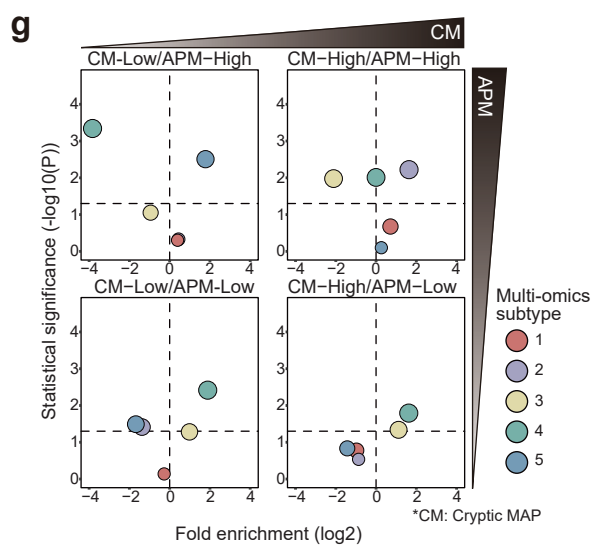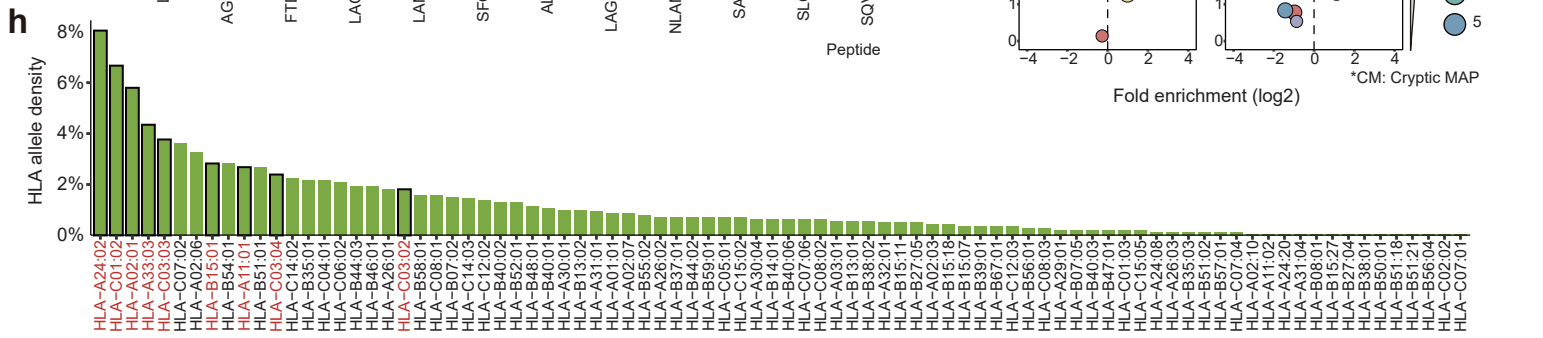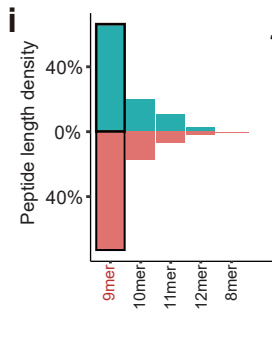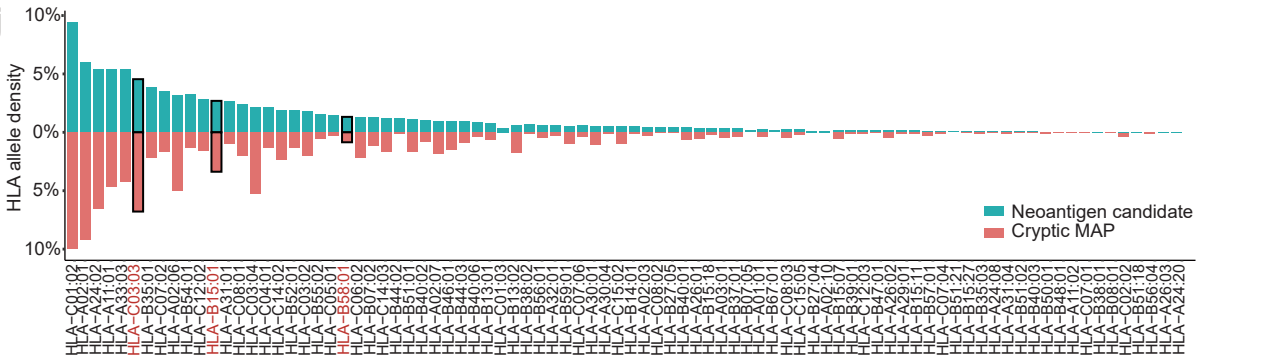

**Supplementary Fig. 6 | The process of identifying neoantigens and cryptic MAPs,**

**along with their characteristics.** **a**, Schematic diagram shows how to identify the type of neoantigen candidate and cryptic MAP. The main processes are shown in blue and detailed processes are shown in orange. **b**, Number of cryptic MAPs derived from novel isoforms, pseudo genes, untranslated regions (UTR), long noncoding RNAs (lncRNA), to be experimentally confirmed (TEC), retained introns, immunoglobulins, and junction variations is shown in the bar plot. **c**, Distribution of the neoantigen candidate load and cryptic MAP load across the patients was described accordingly by the type of neoantigen candidate and cryptic MAP. The middle lines, edges, whiskers, and black dots of the boxplot represent the medians, 25th and 75th percentiles, the most extreme points within  $\pm 1.5 \times \text{IQR}$ , and outliers, respectively. **d**, Bar plot shows the number of confirmed cryptic MAPs observed in more than 3 patients in descending order. The character on the bar indicates the gene from which the peptide is derived. **e-f**, Kaplan-Meier curve shows the survival pattern of the four groups of patients ( $n = 174$ ) divided by confirmed cryptic MAP load and antigen presenting machinery (APM, e) or TIL pattern (f). The p-value was obtained by curve comparison between the two groups having the largest difference with the two-sided log-rank Mantel-Cox test. **g**, Result of enrichment analysis for the four groups described in Figure S6E to the multi-omics subtypes. X- and Y-axis indicate an enrichment and a statistical significance calculated using two-sided Fisher's exact test with Benjamini-Hochberg adjustment. The size of the dot represents the statistical significance. **h**, The bar plots illustrate the frequency



of HLA alleles within our patient cohort. Red highlights denote HLA alleles observed at a frequency of more than 10% in the Korean population, as reported in a previous study<sup>58,59</sup>. **i**, The bar plot displays the frequency of the length of neoantigen candidates and cryptic MAPs in our binding prediction procedure. The red highlight indicates the most common peptide length observed in a large-scale peptidome study<sup>60</sup>. **j**, The frequency of HLA alleles harboring the peptide-MHC complex is depicted. Red highlights indicate HLA alleles that presented shared neoantigens in a previous lung cancer study<sup>61</sup>.

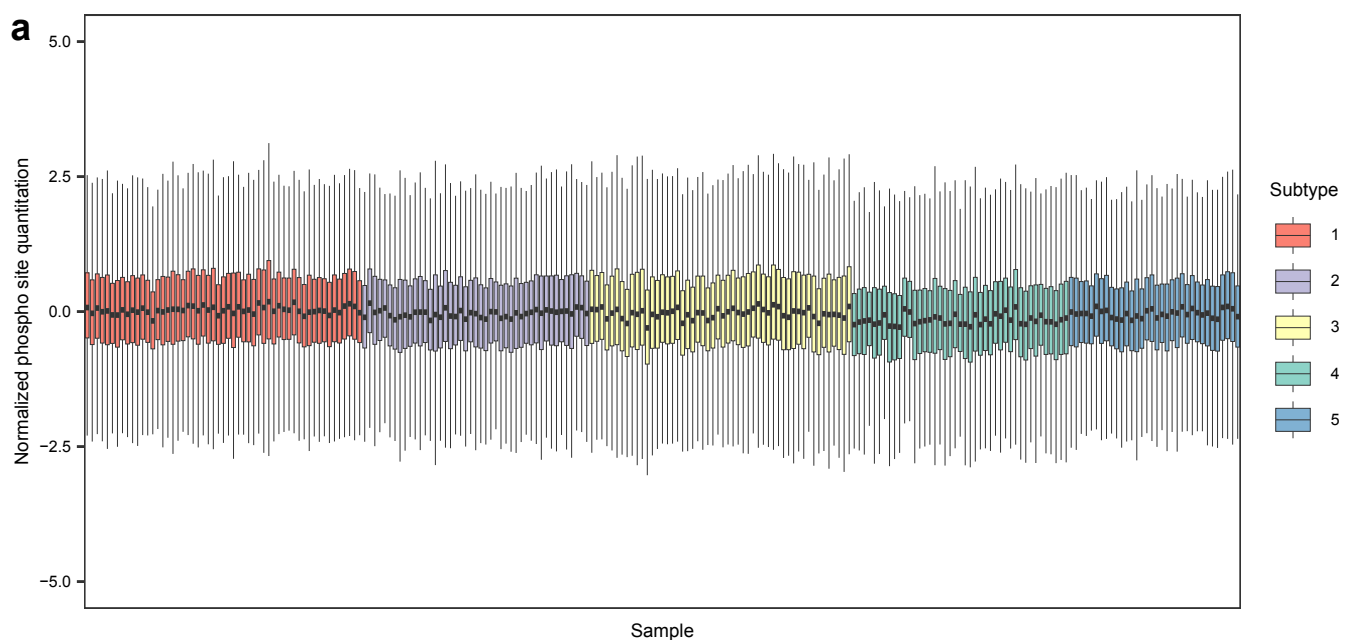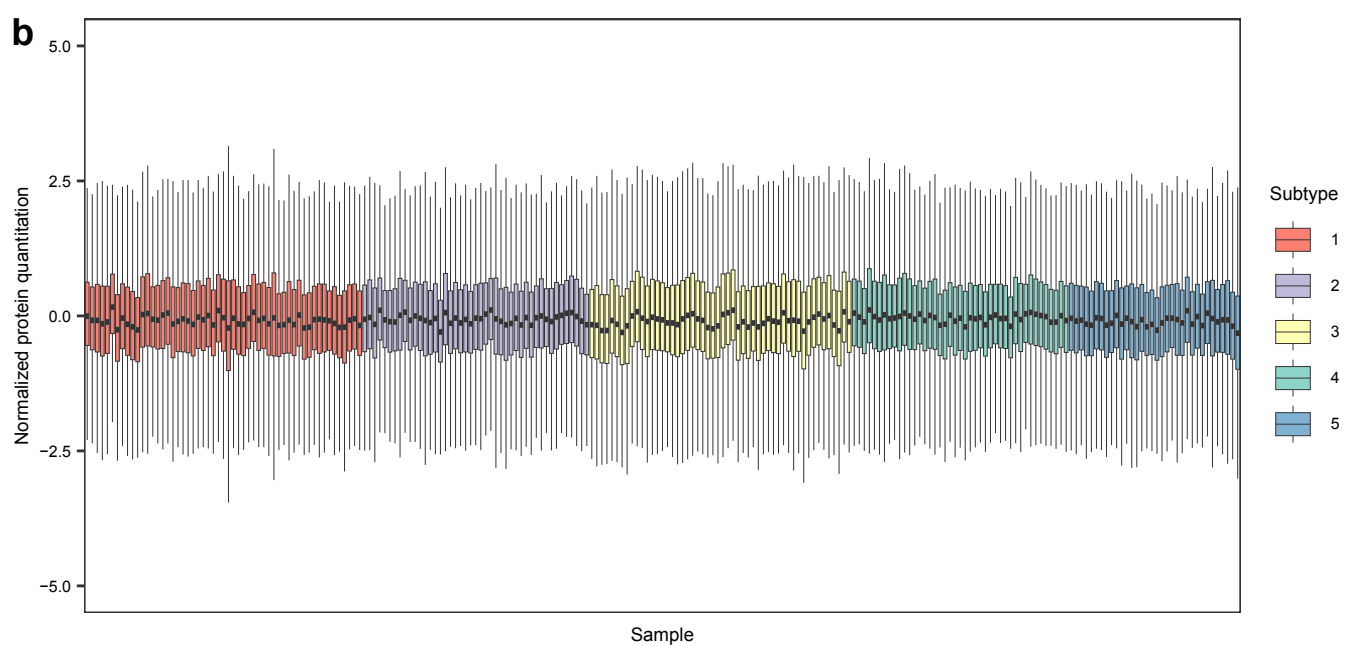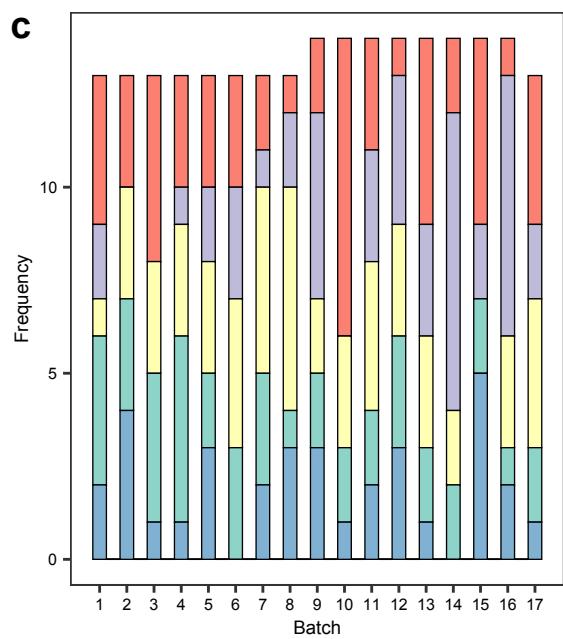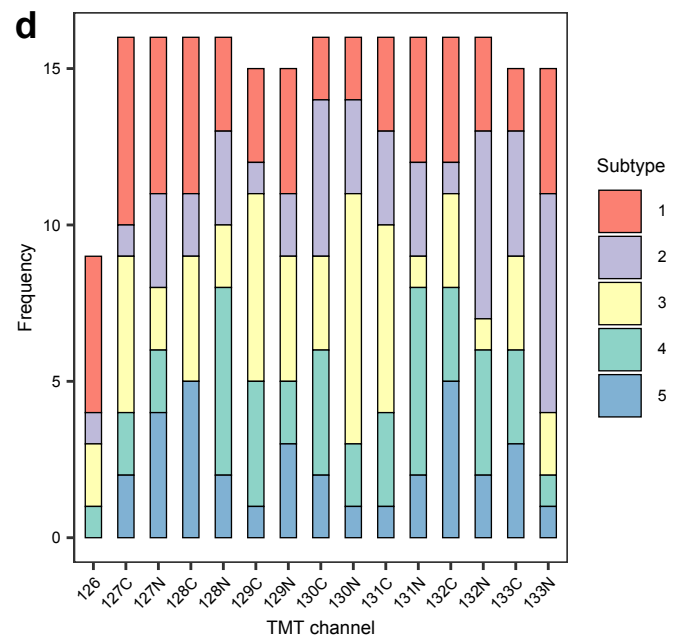

**Supplementary Fig. 7 | Quality assessment of phospho quantitation in 229 patients from a Korean NSCLC cohort.** **a**, Distribution of normalized protein quantitation. **b**, Distribution of normalized phospho site quantitation. **c**, Proportion of subtypes for 17 TMT batches. **d**, Proportion of subtypes for TMT channels.
